# Supplementary material for: Effect of Portal Glucose Sensing on Systemic Glucose Levels in SD and ZDF Rats
Source: PLoS One. 2016 Nov 2;11(11):e0165592. doi: 10.1371/journal.pone.0165592 (PMC5091783; doi:10.1371/journal.pone.0165592)
Supplement: S1 Data — Raw data for glucose levels, hormone levels and mRNA levels for each experimental group. (XLSX) [file pone.0165592.s001.xlsx]

## Sheet: Sheet1
		Glucose levels (mg/dl)							Hormone levels										mRNA levels
									Insulin levels (pg/ml)			C-peptide levels (pg/ml)			GIP levels (pg/ml)				Normalized to b-actin
Sal+Glu		Time (min)							Time (min)
		0	10	30	60	90			0	90		0	90		0	90			G6Pase	PEPCK	GP	GS	Glucokinase	ChREBP
		99	163	209	270	289			72.16	1521		103.35	1447		16.25	31.49			2.42986	1.48434	1.32057	2.01942	1.5502	1.31496
		104	134	218	266	281			72.16	1372		129.73	886.78		21.47	28.1			1.25306	1.92617	1.03657	0.710404	2.37191	2.02548
		110	143	202	254	282			72.16	1197		192.05	1167		19.43	25.78			3.08798	2.45206	0.590426	0.699439	3.97724	2.23887
		112	164	222	302	322			72.16	1438		101.84	1376		10.09	22.54			3.05244	1.99788	0.756	1.58655	3.42414	1.99763
		105	158	225	303	323																	0.384669	1.68828
Mean		106	152.4	215.2	279	299.4			72.16	1382		131.743	1219.19		16.81	26.9775			2.45584	1.96511	0.925891	1.25395	2.34163	1.85304
SE		2.30217	5.93801	4.25911	9.94987	9.53205			0	68.7883		21.0977	125.734		2.48415	1.88742			0.428456	0.198084	0.160577	0.329075	0.64436	0.160652
aMG+Glu		Time (min)							Time (min)
		0	10	30	60	90			0	90		0	90		0	90			G6Pase	PEPCK	GP	GS	Glucokinase	ChREBP
		105	127	177	227	254			72.16	1031		98.01	872.4		15.9	32.74			1.88482	2.47616	0.725699	1.74782	1.16737	3.26359
		107	131	192	231	241			167.46	1196		317.7	970.41		15.56	24.61			1.3679	1.79084	0.983961	1.39626	6.2547	2.03037
		107	149	201	255	276			72.16	940.36		182.03	1179		14.59	39.3			0.986467	1.11178	0.79784	1.32604	4.49714	2.14323
		108	165	202	237	274			292.69	1343		243.2	734.48		25.33	30.57			1.07213	1.30174	0.563631	0.88383	13.6268	1.44887
		109	150	208	235	279			78.32	850.85		262.45	1265		23.21	35.85			1.87445	1.52633	0.771627	0.701005	1.49753	1.22605
Mean		107.2	144.4	196	237	264.8			136.558	1072.24		220.678	1004.26		18.918	32.614			1.43715	1.64137	0.768551	1.21099	5.40871	2.02242
SE		0.663325	6.92532	5.39444	4.81664	7.39865			43.0221	88.5252		37.5543	97.4252		2.22094	2.48427			0.191414	0.237515	0.0674897	0.187466	2.26241	0.354848
3OMG+Glu		Time (min)
		0	10	30	60	90													G6Pase	PEPCK	GP	GS	Glucokinase	ChREBP
		78	106	157	214	257
		93	119	173	236	276
		105	141	191	247	297
		99	145	187	240	291
		98	138	191	262	315
		88	131	184	255	305
Mean		93.5	130	180.5	242.333	290.167
SE		3.88802	6.07728	5.42679	6.87346	8.53392
VAG		Time (min)							Time (min)
		0	10	30	60	90			0	90		0	90		0	90			G6Pase	PEPCK	GP	GS	Glucokinase	ChREBP
		98	141	186	242	264			509.36	1641		445.63	1110		28.64	49.4			2.19353	2.24416	0.566075	1.33342	2.84413	2.41231
		89	124	138	205	242			210.84	1987		489.35	2152		17.63	15.45			0.143545	0.254352	0.578205	0.502007	27.2147	0.95948
		107	149	194	245	289			230.76	1368		360	1134		27.53	36.96			0.687689	0.865443	0.857927	2.17267	4.53589	1.61998
		113	139	179	215	225			112.72	1332		469.52	1387		27.8	32.63
		107	138	191	219	250			208.09	1097		325.7	1157		26.31	23.69
Mean		102.8	138.2	177.6	225.2	254			254.354	1485		418.04	1388		25.582	31.626			1.00825	1.12132	0.667402	1.33603	11.5316	1.66392
SE		4.2	4.04228	10.2206	7.8256	10.7842			66.9622	152.313		31.931	197.34		2.02274	5.78799			0.613101	0.588482	0.0953266	0.48228	7.85675	0.419972
CAP		Time (min)							Time (min)
		0	10	30	60	90			0	90		0	90		0	90			G6Pase	PEPCK	GP	GS	Glucokinase	ChREBP
		82	117	179	222	240			117.08	2242		391.25	2145		33.17	24.39			0.27151	3.33815
		95	134	216	286	314			72.16	1135		171.11	1123		24.05	28.21			0.527584	3.67319
		96	142	198	232	238			161.79	2212		467.66	2885		34.09	50.19			0.27308	8.2256
		110	174	238	310	325			72.16	503.04		192.05	731.45		24.61	20.62			1.07531	3.09728
		103	163	227	298	326			72.16	1603		298.77	1543		25.17	25.11			0.358076	6.08754
		96	144	193	246	264			99.07	1539.01		304.168	1685.49		28.218	29.704			0.849476	3.74813
		87	137	195	261	296			17.9313	330.731		56.8405	380.583		2.22129	5.26199			1.02197	2.36043
Mean		97.875	146.25	206.75	261.75	286.143													0.625286	4.36147
SE		3.52445	7.14095	7.93683	12.7895	14.5642													0.132763	0.77782
Sham		Time (min)							Time (min)
		0	10	30	60	90			0	90		0	90		0	90			G6Pase	PEPCK	GP	GS	Glucokinase	ChREBP
		93	137	198	259	287			110.41	1363		313.55	1264		35.96	34.09
		115	137	195	267	298			559.15	1488		645.16	1466		39.35	62
		100	137	190	235	263			332.81	1117		714.4	1326		44.67	43.59
		94	128	168	213	248			148.52	1897		306	2115		17.39	23.66
		121	151	224	291	323			72.16	747.91		124.26	823.21		38.62	36.81
Mean		104.6	138	195	253	283.8			244.61	1322.58		420.674	1398.84		35.198	40.03
SE		5.67979	3.68782	8.95545	13.4164	13.1583			90.47	191.241		111.614	208.834		4.67105	6.35997
SD aMG		Time (min)							Time (min)
		0	10	30	60	90			0	90		0	90		0	90			G6Pase	PEPCK	GP	GS	Glucokinase	ChREBP
		87	91	73	73	82			176.39	65.38		409.62	464.12		24.28	25.51			1.66457	1.83869	1.0651	3.85893		0.679368
		116	108	106	97	99			94.35	170.69		327.91	324.43		32.68	35.21			4.15947	3.28265	1.15241	2.93196		0.610355
		103	103	91	91	90			361.88	228.97		587.83	480.5		43.28	37.21			1.87069	3.51691	1.09695	6.44569		0.731543
		113	112	96	95	87			232.55	119.78		353.13	396.58		42.38	30.43			2.42107	3.14563	0.717934	3.35729		0.646949
		102	98	94	90	96			179.23	306.7		388.41	547.97		18.17	46.06			2.54352	2.75116	1.36219	2.85715		0.751865
Mean		104.2	102.4	92	89.2	90.8			208.88	178.304		413.38	442.72		32.158	34.884			2.53186	2.90701	1.07892	3.8902		0.684016
SE		5.09313	3.69594	5.37587	4.24735	3.05614			44.1708	42.0044		45.8288	38.1342		4.93045	3.45058			0.438798	0.294587	0.104035	0.663359		0.026157
SD Sal		Time (min)							Time (min)
		0	10	30	60	90			0	90		0	90		0	90			G6Pase	PEPCK	GP	GS	Glucokinase	ChREBP
		92	84	81	82	108			181.12	65.38		271.89	177.97		26.79	22.13			1.18893	2.30805	0.692193	2.28951		0.472023
		105	103	101	104	107			397.74	388.49		358.51	452.44		16.81	24.44			3.00294	2.71843	1.46293	4.67926		0.643497
		109	109	107	106	103			111.71	257.29		259.1	232.39		25.3	23.21			3.14193	4.20828	1.50708	5.9658		0.710715
		81	87	83	82	80			65.38	217.22		70.68	399.09		17.63	25.03			2.92985	2.24868	1.15285	3.37499		0.715367
Mean		96.75	95.75	93	93.5	99.5			188.988	232.095		240.045	315.472		21.6325	23.7025			2.56591	2.87086	1.20376	4.07739		0.635401
SE		6.38194	6.07419	6.48074	6.65207	6.58913			73.5358	66.5265		60.6188	65.55		2.5711	0.646882			0.461096	0.457876	0.187854	0.796776		0.0568805
ZDF aMG		Time (min)							Time (min)
		0	10	30	60	90			0	90		0	90		0	90			G6Pase	PEPCK	GP	GS	Glucokinase	ChREBP
		545	564	490	481	499			787.58	823.63		914.61	798.09		45.22	217.24			3.82515	4.5961	0.382725	2.31092		0.481457
		450	448	437	414	428			1105	874.03		611.11	589.01		58.17	79.04			4.07243	5.31136	0.504872	2.22001		0.77267
		342	333	294	266	223			1177	878.6		687.19	440.88		43.48	81.23			4.5195	5.91781	0.531251	1.88241		0.540769
		468	459	438	424	415			950.98	742.96		1096	734.32		43.79	81.15
Mean		451.25	451	414.75	396.25	391.25			1005.14	829.805		827.227	640.575		42.08	88.62
SE		41.8397	47.2282	42.1097	45.8555	59.0429			77.3622	28.1863		98.7224	71.2442		46.548	109.456			4.13903	5.27509	0.472949	2.13778		0.598299
															2.94802	26.995			0.203188	0.381976	0.0457505	0.130353		0.0888509
ZDF Sal		Time (min)							Time (min)
		0	10	30	60	90			0	90		0	90		0	90			G6Pase	PEPCK	GP	GS	Glucokinase	ChREBP
		491	504	532	521	483			1308	400.04		965.99	298.97		44.72	73.82			8.72601	8.52433	0.792624	2.97687		0.814525
		441	457	438	425	423			1695	423.57		1070	262.43		24.28	48.38			1.90679	3.35289	0.320484	1.00829		0.339639
		486	489	509	488	490			889.41	300.44		1303	550.47		41.21	33.87
		533	530	531	486	493			280.78	58.02		1046	335.83		35.1	48.23
Mean		487.75	495	502.5	480	472.25			1043.3	295.517		1096.25	361.925		36.3275	51.075			5.3164	5.93861	0.556554	1.99258		0.577082
SE		18.8121	15.237	22.1454	20.0125	16.5498			302.751	83.5422		72.4151	64.6096		4.48072	8.31015			3.40961	2.58572	0.23607	0.98429		0.237443
